# Supplementary material
Source: PubMed Central journal article supplement (PMC4443753)
Supplement: NIHMS389841-supplement-01.pdf [file NIHMS389841-supplement-01.pdf]

## Supplemental Data

### Structural Basis of Interdomain

### Communication in the Hsc70 Chaperone

Jianwen Jiang, Kondury Prasad, Eileen M. Lafer, and Rui Sousa

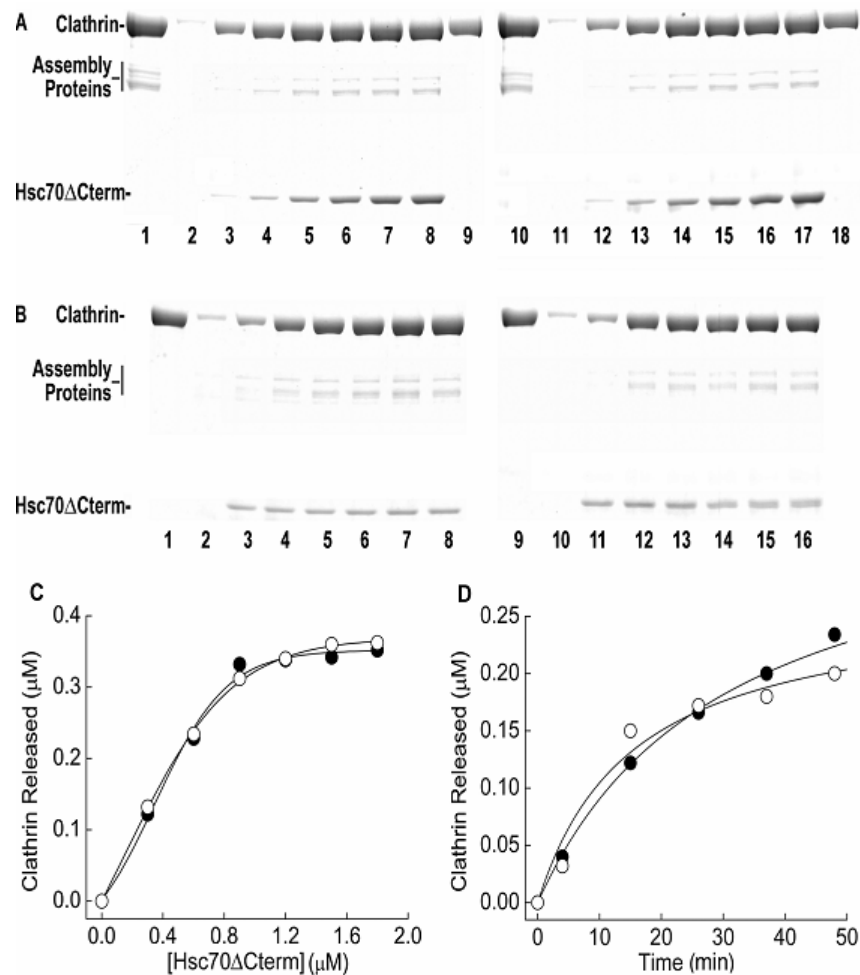

**Figure S1.** Stoichiometry and Kinetics of Clathrin Cage Disassembly by Wt and E213A/D213A bHsc70ΔCterm Proteins

(A) SDS PAGE of cages prepared with clathrin and assembly proteins (lane 1), of ultracentrifugal supernatants from cages (intact cages are in the pellet; released clathrin is in the supernatant) incubated for 40 min. with ATP but no bHsc70ΔCterm (lane 2), or incubated with ATP and 0.3, 0.6, 0.9, 1.2, 1.5, and 1.8 μM bHsc70ΔCterm in lanes 3, 4, 5, 6, 7, and 8, respectively (lane 9: pure clathrin). Lanes 10-18 repeat this experiment using E213A/D214A bHsc70ΔCterm.

(B) Cage disassembly as in (A) but with bHsc70 $\Delta$ Cterm at 0.6  $\mu$ M and incubations of 4, 15, 26, 37, 48, and 59 min. in lanes 3, 4, 5, 6, 7, and 8, respectively (lanes 1 and 2 show, respectively, pure clathrin and supernatant from a disassembly assay incubated with ATP for 40 min. without bHsc70). Lanes 9-16 repeat this experiment with E213A/D214A bHsc70 $\Delta$ Cterm.

(C and D) Quantification of the experiments in (A) and (B), respectively. Empty circles: E213A/D214A; Filled circles: WT.

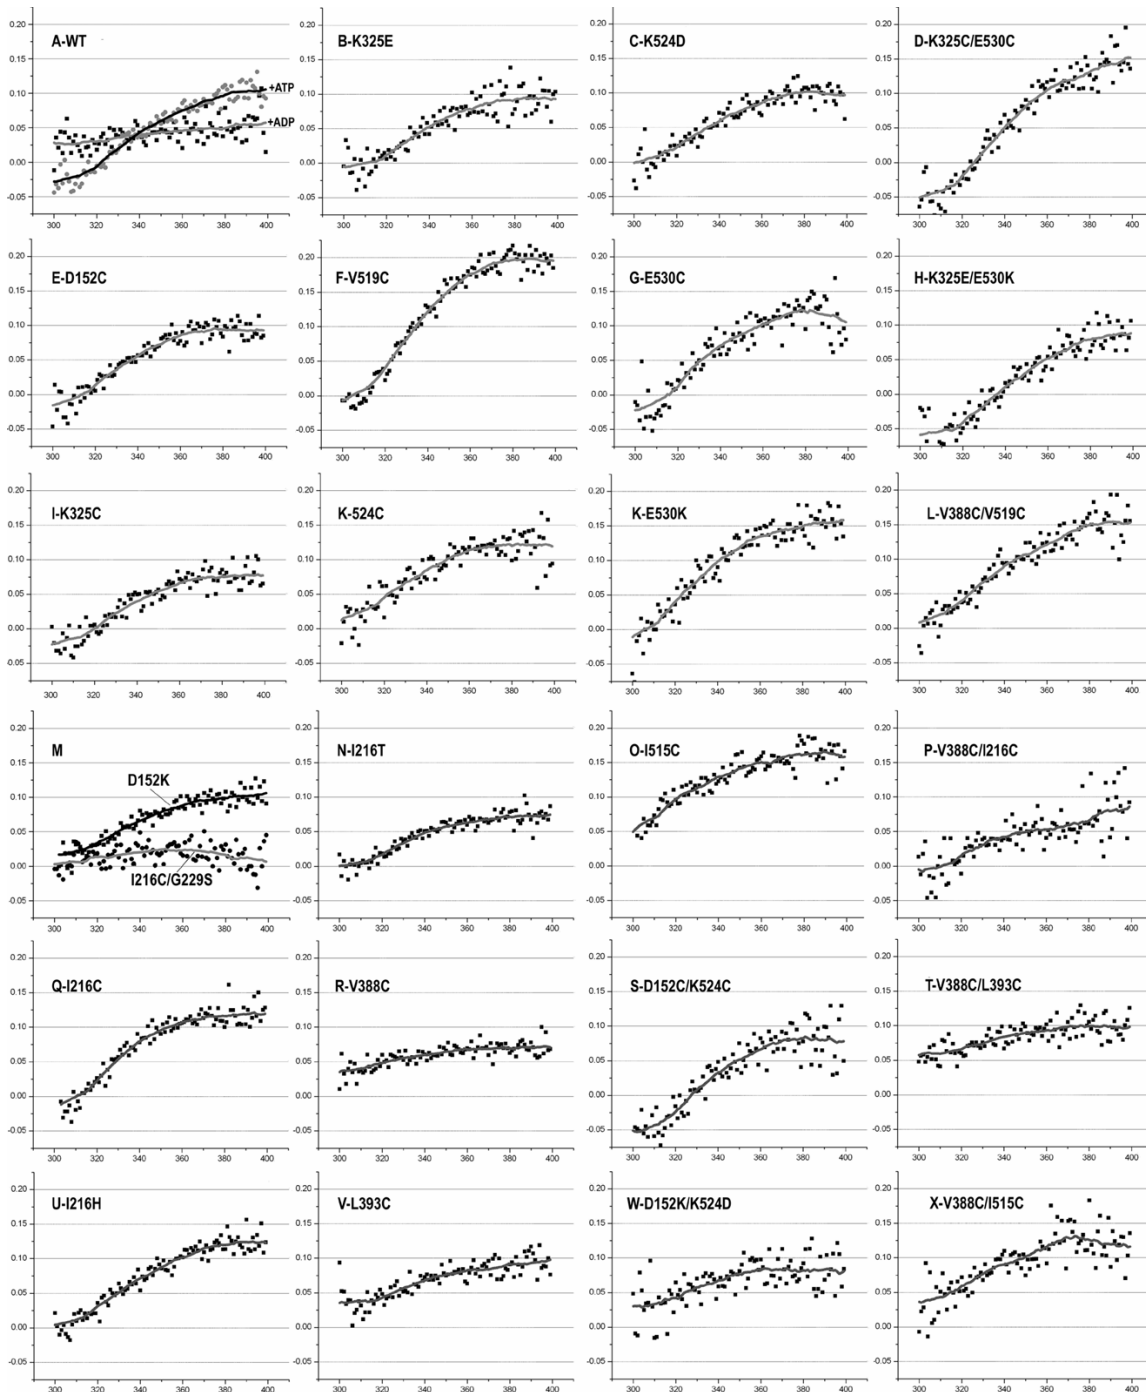

**Figure S2.** Effects of Interdomain Interface and Linker Mutations on ATP-Induced Fluorescence Changes

Fractional differences in W fluorescence spectra with and without ATP  $[(\text{Fluorescence}-\text{ATP})-(\text{Fluorescence}+\text{ATP})]/(\text{Fluorescence}-\text{ATP})$  are plotted. In panel A spectral differences due to ADP are also plotted for comparison, and in panel C spectral differences  $-/+$  ATP are also plotted for D152K and for a completely inactive mutant (I216CG229S).

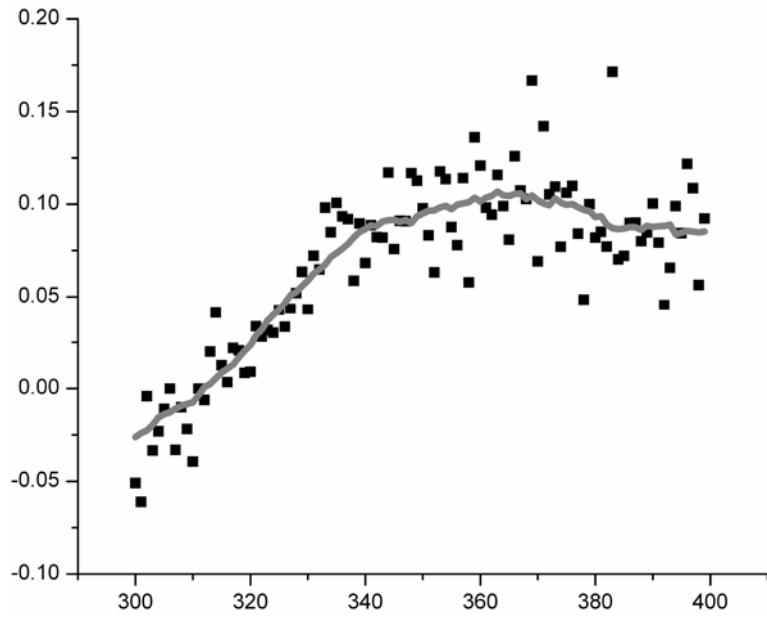

**Figure S3.** Fractional Difference between W Fluorescence Spectra with and Without ATP for Full-Length Hsc70 from Bovine Brain

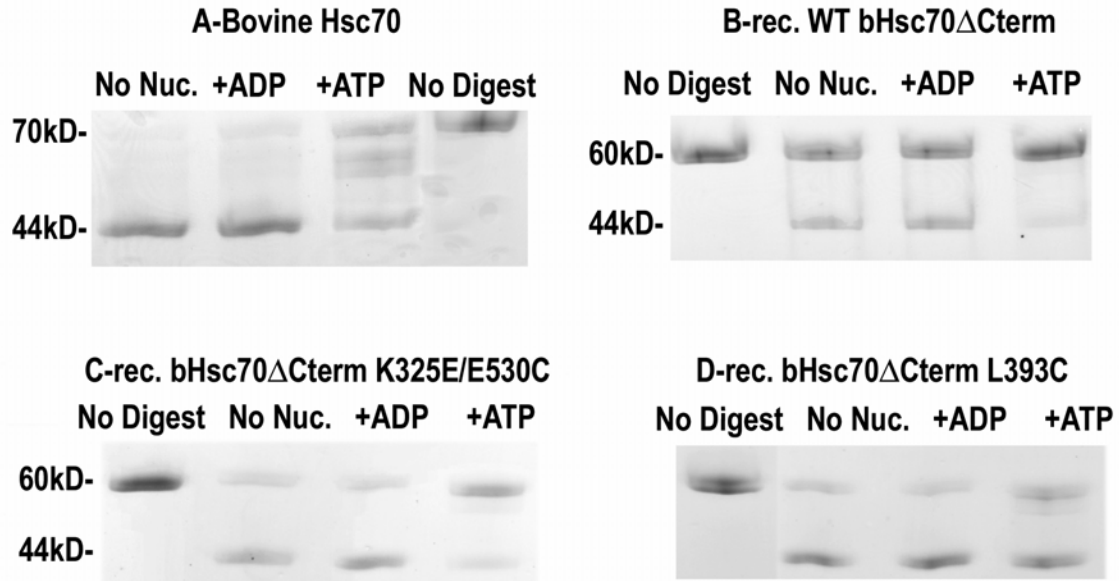

**Figure S4.** Effects of ATP and ADP on Interdomain Linker Protease Sensitivity in Bovine Hsc70 and Recombinant Wt and Mutant bHsc70 $\Delta$ Cterm Enzymes

(A) Products of proteinase K treatment of bovine brain Hsc70 in the absence of nucleotide ('No nuc. '), with ADP or ATP present ('No digest'=no protease control).

(B) As in (A), but with recombinant WT bHsc70 $\Delta$ Cterm.

(C) As in (A), but with an active mutant bHsc70 $\Delta$ Cterm (K325E/E530C).

(D) As in (A), but with a poorly active mutant bHsc70 $\Delta$ Cterm (L393C).

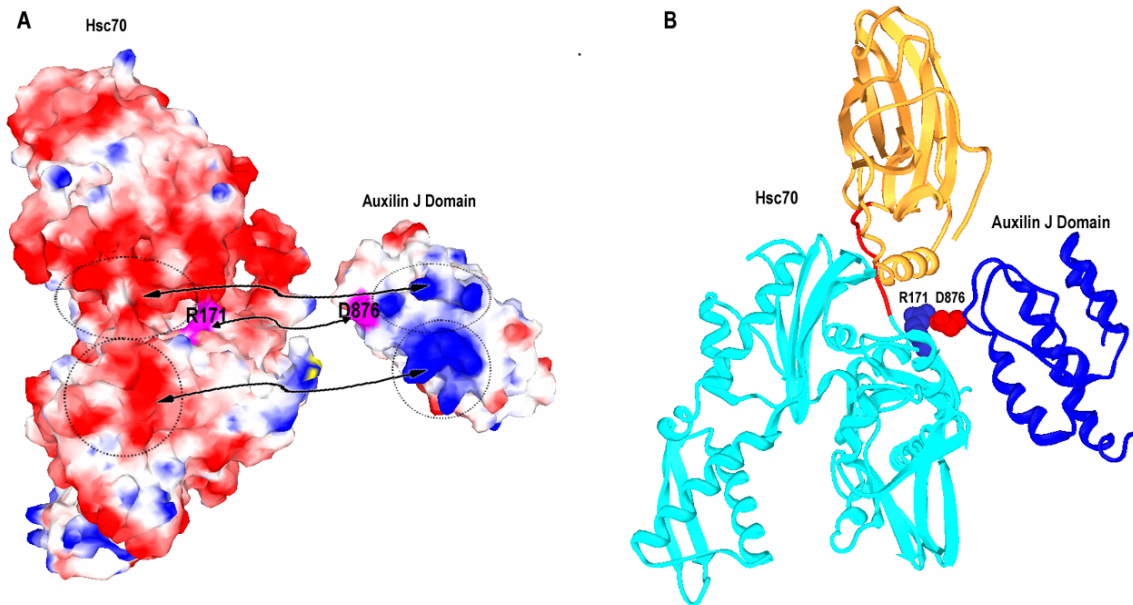

**Figure S5. Modeling of Auxilin J Domain:bHsc70 Interaction**

(A) Electrostatic surface representations of bHsc70 $\Delta$ Cterm and the auxilin J domain. Intergenic suppression analysis (Suh et al., 1998) and disulfide cross-linking of R171C and D876C mutants (unpublished) suggest that R171 and D876 interact in the complex. Positively charged residues on the auxilin J domain surface known to be important for Hsc70 binding (Jiang et al., 2003 and references therein) and negatively charged regions on Hsc70 which may be positioned to interact with these positively charged regions are indicated.

(B) Modeling of the auxilin J domain:bHsc70 complex on the basis of the considerations outlined in A places the J domain near the interdomain interface where it could simultaneously interact with the NBD and SBD.

**Table S1.** Data Collection and Refinement Statistics

|                                  |                                        |
|----------------------------------|----------------------------------------|
| Space Group                      | P2 <sub>1</sub>                        |
| Unit cell (Å)                    | a=65.7, b=50.1, c=87.2, $\beta$ =99.9° |
| Solvent content                  | 47% (1 mol per A.U.)                   |
| Resolution (Å)                   | 50-2.6 (2.69-2.60)                     |
| Wavelength (Å)                   | 1.54                                   |
| R <sub>merge</sub> (%)           | 7.9 (45.9)                             |
| I/ $\sigma$                      | 11.6 (2.4)                             |
| Unique reflections               | 16,521                                 |
| Completeness (%)                 | 98.7                                   |
| R factor                         | 22.0                                   |
| R <sub>free</sub>                | 29.7                                   |
| RMSD bonds (Å)                   | 0.011                                  |
| RMSD angles (°)                  | 1.57                                   |
| non-gly Ramachandran allowed (%) | 99.2                                   |
